# Supplementary material
Source: PubMed Central journal article supplement (PMC5012688)
Supplement: supp_JCO.2015.65.9615_DS_2015.659615.pdf [file supp_JCO.2015.65.9615_DS_2015.659615.pdf]

## **Supplemental Material for**

### **Biomarker Panel for Chronic Graft-Versus-Host Disease**

Jeffrey Yu, Barry E. Storer, Kushi Kushekhar, Mohammad Abu Zaid, Qing Zhang, Philip R. Gafken, Yuko Ogata, Paul J. Martin, Mary E. Flowers, John A. Hansen, Mukta Arora, Corey Cutler, Madan Jagasia, Joseph Pidala, Betty K. Hamilton, George L. Chen, Iskra Pusic, Stephanie J. Lee, and Sophie Paczesny

## **Supplemental Methods**

### ***Proteomics***

The overall proteomics workflow is shown in Appendix Fig. A1 and detailed methods are presented below.

### ***Enzyme-linked immunosorbent assay (ELISA)***

Candidate protein validation was performed with a sequential ELISA protocol.<sup>1-3</sup> Commercial antibody pairs were available for 22 proteins (Table S1), and ST2 and CXCL9 ELISAs were performed as previously reported.<sup>4,5</sup> Samples and standards were analyzed in duplicate as described previously.<sup>1-3</sup>

### ***Statistical analysis***

Clinical differences in the groups with and without cGVHD were compared with Student's t tests for continuous variables and Fisher's exact tests for categorical variables. Logistic regression was used to evaluate the associations between cGVHD and biomarkers after log transformation. All analyses were adjusted for significant clinical variables considering age, sex, stem cell source, conditioning (myeloablative vs. others), donor (matched sibling vs. others), and time from HCT to sample collection, and for steroid use in verification cohort 2. To determine the best combination model, we used forward selection with a 0.05 significance threshold, confirmed by backward selection. Receiver operating characteristic (ROC) curves were generated and the corresponding areas under the curve (AUC) were calculated to determine the best

single biomarker and combination model. For day 100 samples in verification cohort 2, Cox regression was used to evaluate the association between biomarkers and subsequent incidence of cGVHD over the next 3, 6, and 12 months, including cases of cGVHD that arose among controls from the case-control analysis. Death and relapse were treated as competing risks. ROC curve analysis was performed, treating the small number of patients lost to follow-up or competing risks before the 6- and 12-month landmarks as non-cGVHD events. Differences in cGVHD severity between groups were evaluated using the Wilcoxon two-sample tests. The analysis of NRM divided the panel-weighted sum on the median value among cGVHD cases in both verification cohorts and compared cases above and below the median. NRM was estimated using cumulative incidence methods, treating relapse as a competing risk, and compared between groups using Cox regression. All statistical analysis was performed using SAS (Cary, NC).

## ***Proteomics***

### Sample preparation and protein fractionation

Each pool contained 25 µl of plasma. The three pooled plasma samples were then individually immunodepleted of the 20 common hyper-abundant proteins with a ProteoPrep®20 plasma immunodepletion kit (Sigma-Aldrich) according to manufacturer's protocol. The flow-through fractions (depleted plasma) were then concentrated using Vivaspin® 500 (Vivaproducts). After measuring protein concentrations of depleted and concentrated plasma with a Micro BCA protein assay reagent kit (ThermoFisher Scientific), 50-µg aliquots were precipitated using acetone at

-20°C overnight. After centrifugation for 20 minutes at 15,000×g, acetone was decanted, and the air-dried protein pellets were dissolved in 25 µL of 1.0 M triethylammonium bicarbonate, 1 µL of 2% sodium dodecyl sulfate (SDS), and 2 µL of 50 mM tris-(2-carboxyethyl)phosphine (TCEPP) provided in an iTRAQ® reagents application kit <sup>6</sup> – plasma and incubated for 1 hour at 60°C. Cysteine residues were alkylated by adding 1 µL of 84 mM iodoacetamide in water to each vial and incubating for 30 min in darkness. All samples were trypsinized by adding 10 µg trypsin (Sigma-Aldrich) in 10 µL water and incubating them overnight at 37°C. Each pool was labeled with a different tag allowing for differential quantification. Three iTRAQ reagents,<sup>6</sup> 114–116, were added in 70 µL ethanol to each vial along with 10 µL sample buffer plasma to adjust the pH to greater than 8, and the vials were incubated at room temperature for 1 hour. The samples were labeled in the following order: 1) de novo cGVHD with label 114, 2) control with label 115, and 3) progressive cGVHD with label 116. The labeling reaction was quenched by adding 100 µL water and incubating the tubes for 30 min at room temperature. All vials were dried in a speed vac separately and stored at -20°C until fractionation by strong cation-exchange (SCX) chromatography.

The three pooled plasma samples were dissolved in buffer A (7mM potassium phosphate, 30% acetonitrile, pH 2.65) and combined immediately before fractionation with a SCX column (Zorbax 300-SCX 5 µm, 2.1 × 150 mm, Agilent). The sample pH was adjusted to less than 3 with 2% trifluoroacetic acid (TFA). Fractions were collected at 1 minute intervals at a flow rate of 200 µL/min from 1% solvent B (7 mM potassium phosphate, 500 mM KCl, 30% acetonitrile, pH 2.65) to 60% over 40 min (1% B for 7 minutes, 6–15% B for 23 min, 15–34% B for 15 min, and 34–60% B for 10 min) as well

as during column washing with 98% solvent B for 10 min. The chromatographic elution was monitored using a UV detector at  $\lambda=220$  nm. These fractions were consolidated into 20 fractions using the UV trace to distribute the peptide quantities similarly. After drying them in a speed vac, peptides were desalted using Sep-Pak® C18 (50 mg) cartridges. The cartridges were conditioned with 1 mL acetonitrile, 2 × 1 mL of 65% acetonitrile in 0.1% TFA in water followed by 2 × 1 mL of 0.1% TFA. After sample loading in 1 mL of 0.1% TFA and 2 washes with 1 mL of 0.1% TFA, peptides were eluted using 1 mL of 65% acetonitrile in 0.1% TFA in water and dried in a speed vac.

#### LC-MS/MS analysis

LC-MS/MS analysis was performed with an Easy-nLC 1000 (Thermo Scientific) coupled to an Orbitrap Elite mass spectrometer (Thermo Scientific). The LC system configured in a vented format<sup>7</sup> consisted of a fused-silica nanospray needle (PicoTip™ emitter, 75  $\mu\text{m}$  ID, New Objective) packed in-house with 25 cm of Magic C18 AQ 100Å reverse-phase media (Michrom Bioresources Inc.), and a trap (IntegraFrit™ Capillary, 100  $\mu\text{m}$  ID, New Objective) containing 2 cm Magic C18 AQ 200Å. The peptide sample was diluted in 30  $\mu\text{L}$  of 2% acetonitrile and 0.1% formic acid in water, and injection volumes ranging between 4-8  $\mu\text{L}$  were loaded onto the column in triplicate and separated using a two-mobile-phase system consisting of 0.1% formic acid in water (A) and 0.1% formic acid in acetonitrile (B). A 90-min gradient from 7% to 35% B at a flow rate of 400 nL/min was used for chromatographic separation. The mass spectrometer was operated in a data-dependent MS/MS mode over the  $m/z$  range of 400–1800. The precursor scan mass resolution was set to 60,000. For each cycle, the 10 most abundant ions from the precursor scan were selected for MS/MS analysis using 40% normalized HCD collision

energy and analyzed in the orbitrap with the resolution set to 15,000. Selected ions were dynamically excluded for 45 seconds.

#### Peptide and protein identification from mass spectra of digested fragments

The acquired LC-MS/MS data were analyzed using two approaches.<sup>8</sup> In the first approach, Proteome Discoverer™ version 1.4 was used for data analysis. The MS/MS data were searched against the Swiss-Prot human proteome database (release 2012\_01, 74127 entries) using SEQUEST<sup>9</sup> with the following parameters: trypsin was set as the digestion protease, with 2 maximum missed cleavages; precursor and fragment error tolerance were 10 part per million (ppm) and 0.6 Dalton, respectively; iTRAQ modification of N-termini was a fixed modification; and iTRAQ modification of lysine residues, carbamidomethyl on cysteine residues, and oxidation of methionine residues as variable modifications. Identified peptides were filtered according to a 1% peptide-level false discovery rate (FDR) using Percolator.<sup>10</sup> Proteins with at least one identified peptide were reported.

In the second approach, the mass spectra were searched against the same database using Mascot™ version 2.4 with the same parameters as used in the first approach. Identified proteins were then filtered with the significance threshold  $p < 0.05$  and at least one identified peptide.

The mass spectrometry proteomics data have been deposited in the ProteomeXchange Consortium<sup>11</sup> via the PRIDE partner repository with the dataset identifier PXD002762.

## References

1. Paczesny S, Krijanovski OI, Braun TM, et al: A biomarker panel for acute graft-versus-host disease. *Blood* 113:273-8, 2009
2. Vander Lugt MT, Braun TM, Hanash S, et al: ST2 as a marker for risk of therapy-resistant graft-versus-host disease and death. *N Engl J Med* 369:529-39, 2013
3. Fiema B, Harris AC, Gomez A, et al: High throughput sequential ELISA for validation of biomarkers of acute graft-versus-host disease. *J Vis Exp*, 2012
4. Kitko CL, Levine JE, Storer BE, et al: Plasma CXCL9 elevations correlate with chronic GVHD diagnosis. *Blood* 123:786-93, 2014
5. Ponce DM, Hilden P, Mumaw C, et al: High day 28 ST2 levels predict for acute graft-versus-host disease and transplant-related mortality after cord blood transplantation. *Blood* 125:199-205, 2015
6. Ross PL, Huang YN, Marchese JN, et al: Multiplexed protein quantitation in *Saccharomyces cerevisiae* using amine-reactive isobaric tagging reagents. *Mol Cell Proteomics* 3:1154-69, 2004
7. Licklider LJ, Thoreen CC, Peng J, et al: Automation of nanoscale microcapillary liquid chromatography-tandem mass spectrometry with a vented column. *Anal Chem* 74:3076-83, 2002
8. Perkins DN, Pappin DJ, Creasy DM, et al: Probability-based protein identification by searching sequence databases using mass spectrometry data. *Electrophoresis* 20:3551-67, 1999

9. Eng JK, McCormack AL, Yates JR: An approach to correlate tandem mass spectral data of peptides with amino acid sequences in a protein database. *J Am Soc Mass Spectrom* 5:976-89, 1994
10. Kall L, Canterbury JD, Weston J, et al: Semi-supervised learning for peptide identification from shotgun proteomics datasets. *Nat Methods* 4:923-5, 2007
11. Vizcaino JA, Deutsch EW, Wang R, et al: ProteomeXchange provides globally coordinated proteomics data submission and dissemination. *Nat Biotechnol* 32:223-6, 2014



**Table S1: List of 105 proteins with differential ratio in the proteomics experiment**

| Gene name        | prot_accession number | prot_description                                                                                        | 114/115 protRatio | 116/115 protRatio | Gene Ontology Process(es)                                                                                                                                                             | ELISA available |
|------------------|-----------------------|---------------------------------------------------------------------------------------------------------|-------------------|-------------------|---------------------------------------------------------------------------------------------------------------------------------------------------------------------------------------|-----------------|
| ACAN             | P16112                | Aggrecan core protein OS=Homo sapiens GN=ACAN PE=1 SV=2                                                 | 0.37              | 0.52              | extracellular matrix organization and disassembly, cell adhesion, keratan sulfate catabolic process, proteolysis                                                                      | Yes             |
| ADAMTS13         | O76LX8                | A disintegrin and metalloproteinase with thrombospondin motifs 13 OS=Homo sapiens GN=ADAMTS13 PE=1 SV=1 | 0.74              | 0.72              | cell-matrix adhesion, integrin-mediated signaling pathway, proteolysis, response to interferon-gamma, tumor necrosis factor                                                           |                 |
| ADAMTSL4         | F8WAD0                | ADAMTS-like 4 OS=Homo sapiens GN=ADAMTSL4 PE=4 SV=1                                                     | 0.72              | 0.86              | cellular adhesion, angiogenesis                                                                                                                                                       |                 |
| ARHGDI3          | P52566                | Rho GDP-dissociation inhibitor 2 OS=Homo sapiens GN=ARHGDI3 PE=1 SV=3                                   | 1.57              | 1.30              | Rho protein signal transduction, actin cytoskeleton organization, cellular response to redox state, immune response                                                                   |                 |
| ATRN             | O75882                | Attractin OS=Homo sapiens GN=ATRN PE=1 SV=2                                                             | 0.75              | 0.67              | inflammatory response, myelination, response to oxidative stress                                                                                                                      |                 |
| AVIL             | O75366-2              | Isoform 2 of Advillin OS=Homo sapiens GN=AVIL                                                           | 0.61              | 0.85              | actin filament capping, cilium morphogenesis, cytoskeleton organization                                                                                                               |                 |
| C1RL             | Q9NZP8                | Complement C1r subcomponent-like protein OS=Homo sapiens GN=C1RL PE=1 SV=2                              | 0.74              | 0.80              | complement activation, classical pathway, innate immune response, proteolysis                                                                                                         |                 |
| CD44             | P16070-3              | Isoform 3 of CD44 antigen OS=Homo sapiens GN=CD44                                                       | 0.89              | 0.75              | cell-cell interactions, cell adhesion, cell                                                                                                                                           | Yes             |
| CD5L             | O43866                | CD5 antigen-like OS=Homo sapiens GN=CD5L PE=1 SV=1                                                      | 0.80              | 0.51              | apoptosis, cellular defense response, receptor-mediated endocytosis                                                                                                                   |                 |
| CDH5/VE cadherin | P33151                | Cadherin-5 OS=Homo sapiens GN=CDH5 PE=1 SV=5                                                            | 0.81              | 0.75              | adherens junction organization, blood vessel maturation, cell junction assembly                                                                                                       | Yes             |
| CDHR2            | Q9BYE9                | Cadherin-related family member 2 OS=Homo sapiens GN=CDHR2                                               | 1.93              | 1.01              | cell adhesion                                                                                                                                                                         |                 |
| CLEC3B           | P05452                | Tetranectin OS=Homo sapiens GN=CLEC3B PE=1 SV=3                                                         | 0.70              | 0.68              | bone mineralization, cellular response to transforming growth factor beta stimulus                                                                                                    |                 |
| COL1A1           | P02452                | Collagen alpha-1(I) chain OS=Homo sapiens GN=COL1A1 PE=1 SV=5                                           | 0.50              | 0.62              | cartilage and bone development, cellular response to epidermal growth factor, cellular response to fibroblast growth factor, collagen fibril organization, collagen catabolic process |                 |
| COL11A2          | C9J8W5                | Collagen, type XI, alpha 2 OS=Homo sapiens GN=COL11A2 PE=4 SV=1                                         | 0.59              | 0.65              | cartilage development, collagen fibril organization, collagen catabolic process                                                                                                       |                 |
| COL15A1          | P39059                | Collagen alpha-1(XV) chain OS=Homo sapiens GN=COL15A1 PE=1 SV=2                                         | 0.75              | 0.78              | cell adhesion, collagen catabolic process                                                                                                                                             |                 |
| COMP             | P49747                | Cartilage oligomeric matrix protein OS=Homo sapiens GN=COMP PE=1 SV=2                                   | 0.75              | 0.82              | extracellular matrix organization, limb development, cell adhesion, apoptosis                                                                                                         | Yes             |
| CPN1             | P15169                | Carboxypeptidase N catalytic chain OS=Homo sapiens GN=CPN1 PE=1 SV=1                                    | 0.81              | 0.70              | proteolysis, response to glucocorticoid, bradykinin catabolic process                                                                                                                 |                 |
| CR2              | P20023-3              | Isoform C of Complement receptor type 2 OS=Homo sapiens GN=CR2                                          | 0.50              | 0.79              | B cell differentiation, B cell proliferation, immune response, virus receptor activity                                                                                                |                 |
| CRTAC1           | Q9NQ79-3              | Isoform 3 of Cartilage acidic protein 1 OS=Homo sapiens GN=CRTAC1                                       | 0.68              | 0.91              | extracellular matrix organization, negative regulation of receptor binding                                                                                                            |                 |
| DPEP2            | Q9H4A9                | Dipeptidase 2 OS=Homo sapiens GN=DPEP2 PE=1 SV=2                                                        | 0.82              | 0.66              | proteolysis                                                                                                                                                                           |                 |
| DPP4             | P27487                | Dipeptidyl peptidase 4 OS=Homo sapiens GN=DPP4 PE=1 SV=2                                                | 0.92              | 0.72              | T cell activation, endothelial cell migration, negative regulation of extracellular matrix disassembly, proteolysis                                                                   |                 |
| ECM1             | Q16610                | Extracellular matrix protein 1 OS=Homo sapiens GN=ECM1 PE=1 SV=2                                        | 0.71              | 0.86              | angiogenesis, inflammatory response, bone mineralization, T cell migration                                                                                                            | Yes             |
| ENG/CD105        | P17813                | Endoglin OS=Homo sapiens GN=ENG PE=1 SV=2                                                               | 0.73              | 0.77              | cell adhesion, cell chemotaxis, bone morphogenetic protein signaling pathway                                                                                                          | Yes             |
| ENO1             | P06733                | Alpha-enolase OS=Homo sapiens GN=ENO1 PE=1 SV=2                                                         | 1.12              | 1.53              | canonical glycolysis, response to virus                                                                                                                                               |                 |
| FAP              | Q12884                | Seprase OS=Homo sapiens GN=FAP PE=1 SV=5                                                                | 0.72              | 0.84              | angiogenesis, cell adhesion, endothelial cell migration, proteolysis                                                                                                                  | Yes             |
| FBN1             | P35555                | Fibrillin-1 OS=Homo sapiens GN=FBN1 PE=1 SV=3                                                           | 0.73              | 1.00              | cellular response to transforming growth factor beta stimulus, extracellular matrix disassembly, sequestering of bone morphogenetic protein in extracellular matrix                   |                 |
| FCN3             | Q5SSB9                | Ficolin (Collagen/fibrinogen domain containing) 3 (Hakata antigen) OS=Homo sapiens GN=FCN3 PE=2 SV=1    | 0.74              | 0.85              | complement activation, lectin pathway, innate immune response                                                                                                                         | Yes             |
| FGA              | Q6NSD8                | FGA protein OS=Homo sapiens GN=FGA PE=2 SV=1                                                            | 0.89              | 2.29              | acute phase response, adaptive immune response, blood coagulation, cell-matrix adhesion, extracellular matrix organization, fibrinolysis                                              |                 |
| FGB              | P02675                | Fibrinogen beta chain OS=Homo sapiens GN=FGB PE=1 SV=2                                                  | 0.85              | 1.85              | acute phase response, adaptive immune response, blood coagulation, cell-matrix adhesion, extracellular matrix organization, fibrinolysis                                              |                 |
| FGG              | P02679-2              | Isoform Gamma-A of Fibrinogen gamma chain OS=Homo sapiens GN=FGG                                        | 0.86              | 2.27              | acute phase response, adaptive immune response, blood coagulation, cell-matrix adhesion, extracellular matrix organization, fibrinolysis                                              |                 |

|            |          |                                                                                |      |      |                                                                                                                                                                                                                                   |                                  |
|------------|----------|--------------------------------------------------------------------------------|------|------|-----------------------------------------------------------------------------------------------------------------------------------------------------------------------------------------------------------------------------------|----------------------------------|
| FN1        | P02751   | Fibronectin OS=Homo sapiens GN=FN1 PE=1 SV=4                                   | 1.30 | 8.20 | acute phase response, angiogenesis, blood coagulation, cell-matrix adhesion, extracellular matrix organization, leukocyte                                                                                                         | Yes                              |
| GBP1       | P32455   | Interferon-induced guanylate-binding protein 1 OS=Homo sapiens                 | 3.86 | 0.85 | cytokine-mediated signaling pathway, defense response to virus, interferon-gamma-mediated signaling pathway                                                                                                                       |                                  |
| HIST1H2BA  | Q96A08   | Histone H2B type 1-A OS=Homo sapiens GN=HIST1H2BA PE=1 SV=3                    | 1.54 | 2.40 | chromatin organization, inflammatory response, mononuclear cell migration,                                                                                                                                                        |                                  |
| HIST1H2BB  | P33778   | Histone H2B type 1-B OS=Homo sapiens GN=HIST1H2BB PE=1 SV=2                    | 1.54 | 2.40 | chromatin organization, nucleosome assembly                                                                                                                                                                                       |                                  |
| HIST1H2BC  | P62807   | Histone H2B type 1-C/E/F/G/I OS=Homo sapiens GN=HIST1H2BC PE=1 SV=4            | 1.54 | 2.40 | chromatin organization, nucleosome assembly                                                                                                                                                                                       |                                  |
| HIST1H2BD  | P58876   | Histone H2B type 1-D OS=Homo sapiens GN=HIST1H2BD PE=1 SV=2                    | 1.54 | 2.40 | chromatin organization, nucleosome assembly                                                                                                                                                                                       |                                  |
| HIST1H2BJ  | P06899   | Histone H2B type 1-J OS=Homo sapiens GN=HIST1H2BJ PE=1 SV=3                    | 1.54 | 2.40 | chromatin organization, nucleosome assembly                                                                                                                                                                                       |                                  |
| HIST1H2BK  | O60814   | Histone H2B type 1-K OS=Homo sapiens GN=HIST1H2BK PE=1 SV=3                    | 1.54 | 2.40 | chromatin organization, nucleosome assembly                                                                                                                                                                                       |                                  |
| HIST1H2BL  | Q99880   | Histone H2B type 1-L OS=Homo sapiens GN=HIST1H2BL PE=1 SV=3                    | 1.54 | 2.40 | chromatin organization, nucleosome assembly                                                                                                                                                                                       |                                  |
| HIST1H2BM  | Q99879   | Histone H2B type 1-M OS=Homo sapiens GN=HIST1H2BM PE=1 SV=3                    | 1.54 | 2.40 | chromatin organization, nucleosome assembly                                                                                                                                                                                       |                                  |
| HRG        | P04196   | Histidine-rich glycoprotein OS=Homo sapiens GN=HRG PE=1 SV=1                   | 0.81 | 0.72 | angiogenesis, blood coagulation, chemotaxis, defense response to fungus                                                                                                                                                           |                                  |
| HSP90AA1   | P07900   | Heat shock protein HSP 90-alpha OS=Homo sapiens GN=HSP90AA1 PE=1 SV=5          | 0.75 | 0.85 | Fc-gamma receptor signaling pathway involved in phagocytosis, G2/M transition of mitotic cell cycle, cellular response to heat, chaperone mediated autophagy, chaperone mediated protein complex assembly, innate immune response | Yes                              |
| ICOSLG     | O75144   | ICOS ligand OS=Homo sapiens GN=ICOSLG PE=1 SV=2                                | 0.75 | 0.82 | B cell activation, T cell activation, adaptive immune response                                                                                                                                                                    | Yes                              |
| IL1RAP     | C9J9W1   | Interleukin 1 receptor accessory protein OS=Homo sapiens GN=IL1RAP PE=4 SV=1   | 0.74 | 1.10 | cytokine-mediated signaling pathway, immune response                                                                                                                                                                              |                                  |
| ING2       | Q9H160   | Inhibitor of growth protein 2 OS=Homo sapiens GN=ING2 PE=1 SV=1                | 0.85 | 0.34 | chromatin modification, cell proliferation,                                                                                                                                                                                       |                                  |
| ITGB1      | P05556-5 | Isoform Beta-1D of Integrin beta-1 OS=Homo sapiens GN=ITGB1                    | 0.67 | 0.72 | B cell differentiation, blood coagulation, cell migration, cell-matrix adhesion                                                                                                                                                   |                                  |
| KRT3       | P12035   | Keratin, type II cytoskeletal 3 OS=Homo sapiens GN=KRT3 PE=1 SV=1              | 1.77 | 1.11 | epithelial cell differentiation, intermediate filament cytoskeleton organization                                                                                                                                                  |                                  |
| KRT15      | P19012   | Keratin, type I cytoskeletal 15 OS=Homo sapiens GN=KRT15 PE=1 SV=1             | 1.83 | 0.96 | epidermis development, mitophagy in response to mitochondria depolarization                                                                                                                                                       |                                  |
| KRT24      | Q2M215   | Keratin, type I cytoskeletal 24 OS=Homo sapiens GN=KRT24 PE=1 SV=1             | 1.87 | 1.04 | epithelial cell differentiation                                                                                                                                                                                                   |                                  |
| KIT        | P10721   | Mast/stem cell growth factor receptor Kit OS=Homo sapiens GN=KIT PE=1 SV=1     | 0.79 | 0.58 | Kit signaling pathway, T cell differentiation, MAPK cascade, actin cytoskeleton                                                                                                                                                   | Yes                              |
| LAMP1      | P11279   | Lysosome-associated membrane glycoprotein 1 OS=Homo sapiens GN=LAMP1 PE=1 SV=3 | 0.71 | 0.76 | Golgi to lysosome transport, autophagy, granzyme-mediated apoptotic signaling pathway, natural killer cell degranulation                                                                                                          | Yes                              |
| LGALS1     | P09382   | Galectin-1 OS=Homo sapiens GN=LGALS1 PE=1 SV=2                                 | 0.97 | 0.65 | T cell costimulation, apoptosis                                                                                                                                                                                                   |                                  |
| LUM        | P51884   | Lumican OS=Homo sapiens GN=LUM PE=1 SV=2                                       | 0.74 | 0.63 | cartilage development, collagen fibril organization, extracellular matrix organization                                                                                                                                            |                                  |
| MCAM/CD146 | P43121   | Cell surface glycoprotein MUC18 OS=Homo sapiens GN=MCAM PE=1 SV=2              | 0.67 | 0.77 | angiogenesis, cell adhesion, endothelial cell migration, vascular wound healing                                                                                                                                                   | Yes                              |
| MMP3       | P08254   | Stromelysin-1 OS=Homo sapiens GN=MMP3 PE=1 SV=2                                | 1.48 | 1.48 | extracellular matrix organization and disassembly, proteolysis, cell migration                                                                                                                                                    | Yes                              |
| MMRN2      | Q9H8L6   | Multimerin-2 OS=Homo sapiens GN=MMRN2 PE=1 SV=2                                | 0.71 | 0.91 | angiogenesis, cell migration, regulation of vascular endothelial growth factor receptor signaling pathway                                                                                                                         |                                  |
| MRC1       | P22897   | Macrophage mannose receptor 1 OS=Homo sapiens GN=MRC1 PE=1 SV=1                | 1.23 | 1.63 | cellular response to interferon-gamma, cellular response to lipopolysaccharide, receptor mediated endocytosis                                                                                                                     |                                  |
| NCAM1      | P13591-6 | Isoform 6 of Neural cell adhesion molecule 1 OS=Homo sapiens GN=NCAM1          | 0.76 | 0.75 | innate immune response, interferon-gamma-mediated signaling pathway, MAPK cascade                                                                                                                                                 | Yes                              |
| NEO1       | Q92859   | Neogenin OS=Homo sapiens GN=NEO1 PE=1 SV=2                                     | 0.81 | 0.75 | cell adhesion, myoblast fusion                                                                                                                                                                                                    |                                  |
| PCOLCE     | A4D2D2   | Procollagen C-endopeptidase enhancer OS=Homo sapiens GN=PCOLCE PE=4 SV=1       | 0.74 | 0.75 | peptidase activity, proteolysis                                                                                                                                                                                                   |                                  |
| PGK1       | P00558   | Phosphoglycerate kinase 1 OS=Homo sapiens GN=PGK1 PE=1 SV=1                    | 1.32 | 1.33 | Canonical glycolysis, epithelial cell                                                                                                                                                                                             |                                  |
| PI16       | Q6UXB8   | Peptidase inhibitor 16 OS=Homo sapiens GN=PI16 PE=1 SV=1                       | 0.69 | 0.54 | peptidase activity, cell growth                                                                                                                                                                                                   |                                  |
| PI3        | P19957   | Elafin OS=Homo sapiens GN=PI3 PE=1 SV=3                                        | 1.05 | 1.83 | endopeptidase activity                                                                                                                                                                                                            | Already performed in CXCL9 paper |
| PLG        | P00747   | Plasminogen OS=Homo sapiens GN=PLG PE=1 SV=2                                   | 1.00 | 0.60 | extracellular matrix organization and disassembly, blood coagulation, fibrinolysis                                                                                                                                                |                                  |
| PODXL      | O00592   | Podocalyxin OS=Homo sapiens GN=PODXL PE=1 SV=2                                 | 0.84 | 0.69 | cell adhesion, leukocyte migration                                                                                                                                                                                                |                                  |
| POSTN      | B1ALD8   | Periostin, osteoblast specific factor OS=Homo sapiens GN=POSTN PE=4 SV=1       | 0.72 | 0.69 | extracellular matrix organization, regulation of Notch signaling pathway                                                                                                                                                          | Yes                              |

|            |          |                                                                                                                                              |      |      |                                                                                                                                                                                                     |     |
|------------|----------|----------------------------------------------------------------------------------------------------------------------------------------------|------|------|-----------------------------------------------------------------------------------------------------------------------------------------------------------------------------------------------------|-----|
| PPIAL4A    | Q9Y536   | Peptidylprolyl cis-trans isomerase A-like 4A/B/C OS=Homo sapiens GN=PPIAL4A PE=1 SV=1                                                        | 1.36 | 1.29 | protein folding, protein peptidyl-prolyl isomerization                                                                                                                                              |     |
| PRDX2      | P32119   | Peroxisredoxin-2 OS=Homo sapiens GN=PRDX2 PE=1 SV=5                                                                                          | 1.51 | 2.42 | T cell proliferation, activation of MAPK activity, cellular response to oxidative stress                                                                                                            |     |
| PRG2       | P13727   | Bone marrow proteoglycan OS=Homo sapiens GN=PRG2 PE=1                                                                                        | 1.35 | 1.25 | innate immune response                                                                                                                                                                              |     |
| PSMA1      | P25786-2 | Isoform Long of Proteasome subunit alpha type-1 OS=Homo sapiens GN=PSMA1                                                                     | 1.24 | 1.32 | DNA damage response, signal transduction by p53 class mediator resulting in cell cycle arrest, antigen processing and presentation of exogenous peptide antigen via MHC class I                     |     |
| PTPRK      | E9PGC5   | Protein tyrosine phosphatase, receptor type, K OS=Homo sapiens GN=PTPRK PE=4 SV=1                                                            | 0.96 | 0.70 | Cell adhesion, cell migration                                                                                                                                                                       |     |
| PTPRS      | Q13332-5 | Isoform PTPS-F4-7 of Receptor-type tyrosine-protein phosphatase S OS=Homo sapiens GN=PTPRS                                                   | 0.74 | 0.80 | establishment of endothelial intestinal barrier                                                                                                                                                     |     |
| PTX3       | P26022   | Pentraxin-related protein PTX3 OS=Homo sapiens GN=PTX3 PE=1 SV=3                                                                             | 1.04 | 1.64 | inflammatory response, innate immune response, negative regulation of exo-alpha-sialidase activity, opsonization                                                                                    |     |
| RRAGA      | Q7L523   | Ras-related GTP-binding protein A OS=Homo sapiens GN=RRAGA PE=1 SV=1                                                                         | 0.68 | 0.72 | apoptosis, cell cycle arrest, cellular response to starvation, macroautophagy                                                                                                                       |     |
| RRAGB      | Q5VZM2   | Ras-related GTP-binding protein B OS=Homo sapiens GN=RRAGB PE=1 SV=1                                                                         | 0.68 | 0.72 | apoptosis, cell cycle arrest, cellular response to starvation, macroautophagy                                                                                                                       |     |
| S100A9     | P06702   | Protein S100-A9 OS=Homo sapiens GN=S100A9 PE=1 SV=1                                                                                          | 0.73 | 2.20 | autophagy, cytokine production, chemokine production, innate immune response, neutrophils chemotaxis                                                                                                |     |
| SAA1       | E9PQD6   | Serum amyloid A protein OS=Homo sapiens GN=SAA1 PE=3 SV=1                                                                                    | 0.74 | 0.80 | acute phase response, innate immune response, lymphocyte chemotaxis                                                                                                                                 |     |
| SAA2       | G3V1D9   | Serum amyloid A protein OS=Homo sapiens GN=SAA2 PE=3 SV=1                                                                                    | 0.74 | 0.80 | acute phase response, innate immune response, lymphocyte chemotaxis                                                                                                                                 |     |
| SDPR       | O95810   | Serum deprivation-response protein OS=Homo sapiens GN=SDPR PE=1 SV=3                                                                         | 1.52 | 1.28 | Phospholipid binding, protein kinase C binding                                                                                                                                                      |     |
| SELENBP1   | Q13228   | Selenium-binding protein 1 OS=Homo sapiens GN=SELENBP1 PE=1 SV=2                                                                             | 1.09 | 1.62 | Protein transport, selenium binding                                                                                                                                                                 |     |
| SELL/CD62L | P14151   | L-selectin OS=Homo sapiens GN=SELL PE=1 SV=2                                                                                                 | 0.75 | 0.75 | blood coagulation, cell adhesion, leukocyte migration, inflammatory response                                                                                                                        | Yes |
| SELP/CD62P | Q5R345   | Selectin P (Granule membrane protein 140kDa, antigen CD62) OS=Homo sapiens GN=SELP PE=2 SV=1                                                 | 1.25 | 1.25 | blood coagulation, cell adhesion, leukocyte migration, inflammatory response                                                                                                                        | Yes |
| SERPINA1   | P01009   | Alpha-1-antitrypsin OS=Homo sapiens GN=SERPINA1 PE=1 SV=3                                                                                    | 0.86 | 0.33 | Acute phase response, COPII vesicle coating, ER to golgi vesicle-mediated transport, blood coagulation                                                                                              |     |
| SERPINA2   | P20848   | Putative alpha-1-antitrypsin-related protein OS=Homo sapiens GN=SERPINA2 PE=5 SV=1                                                           | 1.21 | 0.46 | endopeptidase activity                                                                                                                                                                              |     |
| SERPINA5   | G3V264   | Serpin peptidase inhibitor, clade A (alpha-1 antitrypsin), member 5 OS=Homo sapiens GN=SERPINA5 PE=4                                         | 0.73 | 1.10 | blood coagulation, lipid transport, endopeptidase activity                                                                                                                                          |     |
| SERPINA6   | P08185   | Corticosteroid-binding globulin OS=Homo sapiens GN=SERPINA6 PE=1 SV=1                                                                        | 0.73 | 0.70 | glucocorticoid metabolic process, endopeptidase activity                                                                                                                                            |     |
| SERPINA7   | P05543   | Thyroxine-binding globulin OS=Homo sapiens GN=SERPINA7 PE=1 SV=2                                                                             | 0.78 | 0.71 | aging, endopeptidase activity, response to corticosterone                                                                                                                                           |     |
| SERPINF2   | B4E1B7   | Serpin peptidase inhibitor, clade F (alpha-2 antiplasmin, pigment epithelium derived factor), member 2 OS=Homo sapiens GN=SERPINF2 PE=2 SV=1 | 0.72 | 0.87 | Acute phase response, blood coagulation, blood vessel morphogenesis, collagen fibril organization, fibrinolysis                                                                                     |     |
| SLIT2      | O94813   | Slit homolog 2 protein OS=Homo sapiens GN=SLIT2 PE=1 SV=1                                                                                    | 0.64 | 0.83 | Roundabout signaling pathway, apoptosis, cell migration involved in sprouting angiogenesis, chemotaxis                                                                                              |     |
| SOD3       | P08294   | Extracellular superoxide dismutase [Cu-Zn] OS=Homo sapiens GN=SOD3 PE=1 SV=2                                                                 | 0.75 | 0.95 | oxidation-reduction process, response to hypoxia                                                                                                                                                    |     |
| SPP1/OPN   | P10451-3 | Isoform C of Osteopontin OS=Homo sapiens GN=SPP1                                                                                             | 0.87 | 0.75 | biomineral tissue development, cell adhesion, cellular response to fluid shear stress, extracellular matrix organization and disassembly, inflammatory response, neutrophils chemotaxis, osteoblast | Yes |
| SPP2       | Q13103   | Secreted phosphoprotein 24 OS=Homo sapiens GN=SPP2 PE=1 SV=1                                                                                 | 0.84 | 0.68 | Bone remodeling                                                                                                                                                                                     |     |
| SYNE1      | E9PEL9   | Spectrin repeat containing, nuclear envelope 1 OS=Homo sapiens GN=SYNE1 PE=4 SV=1                                                            | 0.79 | 0.68 | Golgi organization, cytoskeletal anchoring at nuclear membrane                                                                                                                                      |     |
| TACC2      | O95359   | Transforming acidic coiled-coil-containing protein 2 OS=Homo sapiens GN=TACC2 PE=1 SV=3                                                      | 0.71 | 0.77 | Astral microtubule organization, cell proliferation                                                                                                                                                 |     |
| TGFBI      | Q15582   | Transforming growth factor-beta-induced protein ig-h3 OS=Homo sapiens GN=TGFBI PE=1 SV=1                                                     | 1.25 | 1.25 | angiogenesis, cell adhesion, cell proliferation, chondrocyte differentiation, extracellular matrix organization                                                                                     | Yes |
| TMSB10     | P63313   | Thymosin beta-10 OS=Homo sapiens GN=TMSB10 PE=1 SV=2                                                                                         | 1.54 | 1.25 | actin filament organization                                                                                                                                                                         |     |
| TMSB4X     | P62328   | Thymosin beta-4 OS=Homo sapiens GN=TMSB4X PE=1 SV=2                                                                                          | 1.56 | 1.27 | actin filament organization, blood coagulation, platelet degranulation                                                                                                                              |     |
| TMSL3      | A8MW06   | Thymosin beta-4-like protein 3 OS=Homo sapiens GN=TMSL3 PE=2 SV=1                                                                            | 1.56 | 1.27 | actin filament organization                                                                                                                                                                         |     |
| TMSL4      | Q5T4B6   | HCG1780554 OS=Homo sapiens GN=TMSL4 PE=4 SV=1                                                                                                | 1.56 | 1.27 | actin filament organization                                                                                                                                                                         |     |

|                       |                  |                                                                                                          |              |              |                                                                                                                                                                                                                                                                    |     |
|-----------------------|------------------|----------------------------------------------------------------------------------------------------------|--------------|--------------|--------------------------------------------------------------------------------------------------------------------------------------------------------------------------------------------------------------------------------------------------------------------|-----|
| TNFRSF10C/T<br>RAILR3 | F5H3Y5           | TNFRSF10Cprotein OS=Homo sapiens GN=TNFRSF10C PE=4 SV=1                                                  | 1.28         | 1.25         | extrinsic apoptotic signaling pathway via death domain receptors, immune response, tumor necrosis factor-mediated signaling                                                                                                                                        | Yes |
| TNXB<br>VCAN          | E7EPO1<br>P13611 | Tenascin XB OS=Homo sapiens GN=TNXB PE=4 SV=1<br>Versican core protein OS=Homo sapiens GN=VCAN PE=1 SV=3 | 0.75<br>1.04 | 0.82<br>2.60 | cell-matrix adhesion<br>carbohydrate metabolic process, cell recognition, chondroitin sulfate catabolic process, extracellular matrix organization, actin filament capping, actin filament depolymerization, cellular response to epidermal growth factor stimulus |     |
| VIL1                  | P09327           | Villin-1 OS=Homo sapiens GN=VIL1 PE=1 SV=4                                                               | 0.62         | 0.67         |                                                                                                                                                                                                                                                                    |     |
| VNN1                  | O95497           | Pantetheinase OS=Homo sapiens GN=VNN1 PE=1 SV=2                                                          | 1.14         | 0.70         | acute inflammatory response, chronic inflammatory response, pantothenate metabolic process, positive regulation of T cell differentiation in thymus. response to complement activation, alternative pathway,                                                       |     |
| VSIG4                 | O9Y279           | V-set and immunoglobulin domain-containing protein 4 OS=Homo sapiens GN=VSIG4 PE=1 SV=1                  | 1.15         | 1.77         | negative regulation of T cell proliferation, negative regulation of interleukin-2 production                                                                                                                                                                       |     |

**Table S2: Twenty-two proteins selected from the proteomics discovery**

| Protein           | Description                                                                                   | Commercial ELISA provider | Plasma dilution | LLOD        | ULOD       |
|-------------------|-----------------------------------------------------------------------------------------------|---------------------------|-----------------|-------------|------------|
| ACAN              | aggrecan                                                                                      | R&D DuoSet                | 1/3             | 125 pg/mL   | 8000 pg/mL |
| CD44              | CD44 molecule                                                                                 | eBioscience               | 1/60            | 125 pg/mL   | 4000 pg/mL |
| CDH5/VE cadherin  | cadherin 5, type 2 (vascular endothelium)                                                     | R&D Quantikine            | 1/100           | 1.56 ng/mL  | 100 ng/mL  |
| COMP              | cartilage oligomeric matrix protein                                                           | R&D Quantikine            | 1/100           | 0.16 ng/mL  | 10 ng/mL   |
| ECM1              | extracellular matrix protein 1                                                                | SinoBiological            | 1/2000          | 0.023 ng/mL | 1.5 ng/mL  |
| ENG/CD105         | endoglin                                                                                      | R&D DuoSet                | 1/50            | 125 pg/mL   | 8000 pg/mL |
| FAP               | fibroblast activation protein, alpha                                                          | R&D DuoSet                | 1/100           | 62.5 pg/mL  | 4000 pg/mL |
| FCN3              | ficolin (collagen/fibrinogen domain containing) 3                                             | Hycult                    | 1/150           | 7.8 ng/mL   | 500 ng/mL  |
| FN1               | fibronectin 1                                                                                 | eBioscience               | 1/20000         | 0.31 ng/mL  | 20 ng/mL   |
| HSP90a            | Heat shock protein 90 alpha                                                                   | Enzo Life Science         | 1/25            | 0.063 ng/mL | 4 ng/mL    |
| ICOSLG            | inducible T-cell co-stimulator ligand                                                         | SinoBiological            | 1/30            | 0.063 ng/mL | 4 ng/mL    |
| C-KIT             | v-kit Hardy-Zuckerman 4 feline sarcoma viral oncogene homolog                                 | Cell Sciences             | 1/15            | 0.31 ng/mL  | 10 ng/mL   |
| LAMP1             | lysosomal-associated membrane protein 1                                                       | SinoBiological            | 1/100           | 15.6 pg/mL  | 1000 pg/mL |
| MCAM/CD146        | melanoma cell adhesion molecule                                                               | SinoBiological            | 1/250           | 0.078 ng/mL | 5 ng/mL    |
| MMP3              | matrix metalloproteinase 3 (stromelysin 1)                                                    | R&D DuoSet                | 1/25            | 31.2 pg/mL  | 2000 pg/mL |
| NCAM1/CD56        | neural cell adhesion molecule 1                                                               | R&D DuoSet                | 1/200           | 78.1 pg/mL  | 5000 pg/mL |
| POSTN             | periostin, osteoblast-specific factor                                                         | R&D DuoSet                | 1/25            | 0.36 ng/mL  | 24 ng/mL   |
| SELL/CD62L        | selectin L                                                                                    | R&D DuoSet                | 1/200           | 78.1 pg/mL  | 5000 pg/mL |
| SELP              | selectin P                                                                                    | R&D DuoSet                | 1/50            | 125 pg/mL   | 8000 pg/mL |
| SPP1/OPN          | osteopontin/secreted phosphoprotein 1                                                         | R&D DuoSet                | 1/25            | 62.5 pg/mL  | 4000 pg/mL |
| TGFBI             | transforming growth factor, beta-induced, 68 kDa                                              | R&D DuoSet                | 1/1000          | 62.5 pg/mL  | 4000 pg/mL |
| TNFRSF10C/TRAILR3 | tumor necrosis factor receptor superfamily, member 10c, decoy without an intracellular domain | R&D DuoSet                | 1/25            | 62.5 pg/mL  | 4000 pg/mL |

LLOD, lower limit of detection; ULOD, upper limit of detection.

**Table S3. Biomarker panel according to cGVHD status and particular organ involvement in verification cohort 1 and 2.**

|                       | Organ | N                     |            |            | Median (range)        |                   |                   | P-value            |                           |                           |                           |
|-----------------------|-------|-----------------------|------------|------------|-----------------------|-------------------|-------------------|--------------------|---------------------------|---------------------------|---------------------------|
|                       |       | Control<br>(No cGVHD) | cGVHD +    |            | Control<br>(No cGVHD) | cGVHD+            |                   | Kruskal-<br>Wallis | cGVHD+                    |                           |                           |
|                       |       |                       | Organ<br>- | Organ<br>+ |                       | Organ<br>-        | Organ<br>+        |                    | Organ +<br>vs.<br>Organ - | Organ –<br>vs.<br>Control | Organ +<br>vs.<br>Control |
| Verification cohort 1 | Skin  | 33                    | 65         | 113        | 10.0 (7.5-13.7)       | 12.7 (7.8-19.1)   | 12.8 (8.8-17.3)   | <0.0001            | 0.58                      | <0.0001                   | <0.0001                   |
|                       | GI    | 33                    | 121        | 57         | 10.0 (7.5-13.7)       | 12.6 (8.8-19.1)   | 13.3 (7.8-17.3)   | <0.0001            | 0.07                      | <0.0001                   | <0.0001                   |
|                       | Mouth | 33                    | 67         | 111        | 10.0 (7.5-13.7)       | 12.6 (9.0-19.1)   | 12.8 (7.8-17.3)   | <0.0001            | 0.99                      | <0.0001                   | <0.0001                   |
|                       | Eye   | 33                    | 97         | 81         | 10.0 (7.5-13.7)       | 12.9 (8.8-19.1)   | 12.6 (7.8-17.3)   | <0.0001            | 0.37                      | <0.0001                   | <0.0001                   |
|                       | Lung  | 33                    | 61         | 116        | 10.0 (7.5-13.7)       | 12.8 (7.8-17.3)   | 12.7 (8.8-19.1)   | <0.0001            | 0.46                      | <0.0001                   | <0.0001                   |
|                       | Liver | 33                    | 97         | 80         | 10.0 (7.5-13.7)       | 12.5 (7.8-16.6)   | 13.1 (9.1-19.1)   | <0.0001            | 0.003                     | <0.0001                   | <0.0001                   |
| Verification cohort 2 | Skin  | 93                    | 39         | 44         | 2.04 (0.32-3.97)      | 2.85 (0.19-4.69)  | 3.08 (-0.34-4.84) | <0.0001            | 0.83                      | <0.0001                   | <0.0001                   |
|                       | GI    | 93                    | 62         | 22         | 2.04 (0.32-3.97)      | 2.92 (-0.34-4.84) | 3.34 (0.19-4.92)  | <0.0001            | 0.14                      | <0.0001                   | 0.0003                    |
|                       | Mouth | 93                    | 37         | 48         | 2.04 (0.32-3.97)      | 2.95 (1.11-4.84)  | 2.97 (-0.34-4.92) | <0.0001            | 0.46                      | <0.0001                   | <0.0001                   |
|                       | Eye   | 93                    | 51         | 33         | 2.04 (0.32-3.97)      | 3.00 (-0.34-4.69) | 2.95 (1.85-4.92)  | <0.0001            | 0.19                      | <0.0001                   | <0.0001                   |
|                       | Lung  | 93                    | 42         | 40         | 2.04 (0.32-3.97)      | 3.01 (1.30-4.92)  | 2.89 (-0.34-4.56) | <0.0001            | 0.51                      | <0.0001                   | <0.0001                   |
|                       | Liver | 93                    | 41         | 41         | 2.04 (0.32-3.97)      | 2.82 (-0.34-4.92) | 3.02 (1.30-4.56)  | <0.0001            | 0.35                      | 0.0001                    | <0.0001                   |
